# Supplementary material
Source: PubMed Central journal article supplement (PMC3517799)
Supplement: NIHMS415950-supplement-Supplement1.pdf [file NIHMS415950-supplement-Supplement1.pdf]

## Supplementary Appendix

This appendix has been provided by the authors to give readers additional information about their work.

Supplement to: Kelly HW, Sternberg AL, Lescher R, et. al. Effect of inhaled glucocorticoids in childhood on adult height. *N Engl J Med* 2012;367:904-12. DOI: 10.1056/NEJMoa1203229

**Online Supplementary Appendix**  
**for**  
**Effect of Inhaled Corticosteroid Use in Childhood on Adult Height**

H. William Kelly, Pharm.D., University of New Mexico, Albuquerque, NM  
 Alice L. Sternberg, Sc.M., Johns Hopkins University, Baltimore, MD  
 Rachel Lescher, M.D., Washington University, St Louis, MO and Alaska Native Medical Center,  
 Anchorage, AK  
 Anne L. Fuhlbrigge, M.D., Brigham and Women's Hospital, Boston, MA  
 Paul Williams, M.D., University of Washington, Seattle, WA  
 Robert S. Zeiger, M.D., Ph.D., University of California, San Diego and Kaiser Permanente  
 Southern California Region, San Diego, CA  
 Hengameh H. Raissy, Pharm.D., University of New Mexico, Albuquerque, NM  
 Mark L. Van Natta, M.H.S., Johns Hopkins University, Baltimore, MD  
 James Tonascia, Ph.D., Johns Hopkins University, Baltimore, MD  
 Robert C. Strunk, M.D., Washington University, St Louis, MO

for the CAMP Research Group

**Corresponding author:**

H. William Kelly, Pharm.D.  
 9828 Guadalupe Trail NW  
 Albuquerque, New Mexico 87114  
[hwkelly@salud.unm.edu](mailto:hwkelly@salud.unm.edu)  
 Phone: 505-898-8231  
 FAX: 505-272-8240

**Table of contents**

|                                                                                                                                                                                 | <b>Page</b> |
|---------------------------------------------------------------------------------------------------------------------------------------------------------------------------------|-------------|
| Investigator listing                                                                                                                                                            | 2-5         |
| Figure S1. CAMP trial and follow-up design and features                                                                                                                         | 6           |
| Figure S2. Growth velocity by sex and age for 1041 participants during the first<br>2 years of treatment in the CAMP trial                                                      | 7           |
| Table S1. Adjusted mean* adult height (cm)† by treatment group for 943<br>participants with adult height known, overall and by subgroup                                         | 8-9         |
| Table S2. Comparison of those with adult height missing* to those with adult<br>height known, as of entry into the CAMP trial                                                   | 10-12       |
| Table S3. Measures of treatment and other characteristics related to adult height in<br>mild/moderate asthma for 914 participants with adult height and all<br>covariates known | 13-15       |

Members of the CAMP Research Group:

*Clinical centers*

**ASTHMA, Inc, Seattle, WA:** Paul Williams, MD (Principal Investigator); Mary V. Lasley, MD (Co-Director); Tamara Chinn, MSN, ARNP (Coordinator). Michele Hinatsu, MSN, ARNP; Clifton T. Furukawa, MD; Leonard C. Altman, MD; Frank S. Virant, MD; Michael S. Kennedy, MD; Jonathan W. Becker, MD; Stephen Tilles, MD; Miranda MacLaren. C. Warren Bierman, MD (1992-1997); Dan Crawford, RN (1996-2002); Thomas DuHamel (1991-2004); Heather Eliassen, BA (1996-1999); Babi Hammond (1996-1999); Dominick A. Minotti, MD (1992-2003); Chris Reagan (1992-2003); Gail Shapiro (1991-2006, Principal Investigator); Marian Sharpe, RN (1992-1994); Ashley Tatum, MD (2004-2007); Grace White (1991-2007). Timothy G. Wighton, PhD (1994-1998).

**Brigham & Women's Hospital and Harvard Vanguard Medical Associates, Boston, MA:** Anne Fuhlbrigge, MD (Principal Investigator); Anne Plunkett, NP, MS (Coordinator). Nancy Madden, RN, BSN; Mark Boehnert, MD; Christine Darcy; Anita Feins, MD; Natalia Kandror, MD; Kelly MacAulay, MD; Scott Weiss MD. Walter Torda, MD (Co-Investigator Director, 1993-2003); Martha Tata, RN (1993-2002); Sally Babigian, RN (1997-1999); Peter Barrant, MD (2004-2007); Linda Benson (1998-2004); Jose Caicedo (1998-1999); Tatum Calder (1998-2001); Anthony DeFilippo (1994-2000); Cindy Dorsainvil (1998-2001); Julie Erickson (1998-1999); Phoebe Fulton (1997); Mary Grace, RN (1994-1996); Jennifer Gilbert (1997-1998); Dirk Greineder, MD (1993-2000); Stephanie Haynes (1993-1998); Margaret Higham, MD (1996-1998); Deborah Jakubowski (1999); Susan Kelleher (1993-1997); Jay Koslof, PhD (1993-1995); Dana Mandel (1996-1998); Patricia Martin (2001-2003); Agnes Martinez (1994-1997); Jean McAuliffe (1994-1995); Erika Nakamoto (2002-2004); Paola Pacella (1993-1998); Paula Parks (1993-1995); Johanna Sagarin (1998-1999); Kay Seligsohn, PhD (1995-2004); Susan Swords (2003-2005); Meghan Syring (1998-2001); June Traylor, MSN, RN (1996-1998); Melissa Van Horn, PhD (1996-1999); Carolyn Wells, RN (1993-1995); Ann Whitman, RN (1994-1996).

**The Hospital for Sick Children, Toronto, Ontario, Canada:** Hartmut Grasmann, MD (Principal Investigator); Melody Miki, RN, BSN (Coordinator); Melinda Solomon, MD; Padmaja Subbarao, MD. Ian MacLusky, MD, FRCP (Director 1999-2007); Joe Reisman, MD, FRCP(C), MBA (Director, 1996-1999); Henry Levison, MD, FRCP(C) (Director, 1992-1996); Anita Hall, RN (Coordinator, 1993-2007). Yola Benedet (1994-1999); Susan Carpenter, RN (1998-2001); Jennifer Chay (2004); Michelle Collinson, RN (1994-1998); Jane Finlayson-Kulchin, RN (1994-1998); Kenneth Gore, MA (1993-1999); Nina Hipolito, RN (2003-2004); Noreen Holmes, RRT (1998-1999); Erica Hoorntje, RN (2002-2003); Sharon Klassen, MA(1999-2000); José Quenneville, MSc (1993-1995); Renée Sananes, PhD (1993-2004); Christine Wasson, PhD (1999); Margaret Wilson, RN (2001-2002).

**Johns Hopkins Asthma & Allergy Center, Baltimore, MD:** N. Franklin Adkinson, Jr, MD (Director); Deborah Bull, LPN (Coordinator); Stephanie Philips, RN. Peyton Eggleston,

MD (Co-Director, 1991-2004); Karen Huss, DNSc (Co-Investigator, 1991-2004); Leslie Plotnick, MD (Co-Investigator, 1991-1999); Margaret Pulsifer, PhD (Co-Investigator, 1993-2004); Cynthia Rand, PhD (Co-Investigator, 1991-2004). Elizabeth Aylward, PhD (1991-2004), Nancy Bollers, RN (Coordinator, 1993-2004); Kathy Pessaro (2004-2007); Barbara Wheeler, RN, BSN (Coordinator, 1991-1999).

**National Jewish Health, Denver, CO:** Stanley Szeffler, MD (Director); Harold S. Nelson, MD (Co-Director); Bruce Bender, PhD (Co-Investigator); Ronina Covar, MD (Co-Investigator); Andrew Liu, MD (Co-Investigator); Joseph Spahn, MD (Co-Investigator); D Sundström (Coordinator); Melanie Phillips; Michael P. White; Melanie Gleason, PA-C; Marzena Krawiec, MD; Gary Larsen, MD; Gayle Spears, PA-C. Kristin Brelsford (1997-1999); Jessyca Bridges (1995-1997); Jody Ciacco (1993-1996); Michael Eltz (1994-1995); Jeryl Feeley, MA (Coordinator, 1992-1995); Michael Flynn (1995-1996); Tara Junk-Blanchard (1997-2000); Joseph Hassell (1992-1998); Marcia Hefner (1992-1994); Caroline Hendrickson, RN (1995-1998; Coordinator, 1995-1997); Daniel Hettleman, MA (1995-1996); Charles G. Irvin, PhD (1992-1998); Alan Kamada, PharmD (1994-1997); Sai Nimmagadda, MD (1993-1996); Kendra Sandoval (1995-1997); Jessica Sheridan (1994-1995); Trella Washington (1993-1997); Eric Willcutt, MA (1996-1997). We also thank the pediatric allergy/immunology and pulmonary fellows for their participation (Ivan Cardona, MD; Kirstin Carel, MD; Jayna Doshi, MD; Rich Hendershot, MD; Jeffrey Jacobs, MD; Neal Jain, MD; June-ku Brian Kang, MD; Tracy Kruzick, MD; Harvey Leo, MD; Beth Macomber, MD; Jonathan Malka, MD; Chris Mjaanes, MD; John Prpich, MD; Lora Stewart, MD; Ben Song, MD; Grace Tamesis, MD).

**University of California, San Diego and Kaiser Permanente Southern California**

**Region, San Diego, CA:** Robert S. Zeiger, MD, PhD (Director); Noah Friedman, MD (Co-Investigator); Michael H. Mellon, MD (Co-Investigator); Michael Schatz, MD (Co-Investigator); Kathleen Harden, RN (Coordinator). Terrie Long, RN; Travis Macaraeg; Elsa Rodriguez; Eva Rodriguez, RRT. Sandra Christensen, MD (2004-2007); James G. Easton, MD (Co-Director, 1993-1994); M. Feinberg (1997-1998); Linda L. Galbreath (1991-2002); Jennifer Gulczynski (1998-1999); Ellen Hansen (1995-1997); Al Jalowayski, PhD (Co-Investigator, 1991-2005); Elaine Jenson (2004-2007); Alan Lincoln, PhD (Co-Investigator, 1991-2003); Jennie Kaufman (1994); Shirley King, MSW (1992-1999); Brian Lopez (1997-1998); Michaela Magiari-Ene, MA (1994-1998); Kathleen Mostafa, RN (1994-1995); Avraham Moscona (1994-1996); Catherine A. Nelle, RN (1991-2005); Jennifer Powers (2001-2003); Karen Sandoval (1995-1996); Nevin W. Wilson, MD (Co-Director, 1991-1993).

**University of New Mexico, Albuquerque, NM:** H. William Kelly, PharmD (Director); Aaron Jacobs (Co-Investigator); Hengameh H. Raissy, PharmD, PhC (Co-Investigator); Mary Spicher, RN (Coordinator). Christina Batson. Robert Annett, PhD (Co-Investigator, 1993-2004); Teresa Archibeque (1994-1999); Naim Bashir, MD (Co-Investigator, 1998-2005); H. Selda Bereket (1995-1998); Marisa Braun (1996-1999); Carrie Bush (1995-1999); Shannon C. Bush (2002-2007); Michael Clayton, MD (Co-Investigator, 1999-

2001); Angel Colon-Semidey, MD (Co-Investigator, 1997-2000); Sara Devault (1993-1997); Anna Esparham (2004-2007); Roni Grad, MD (Co-Investigator, 1993-1995); David Hunt, RRT (1995-2004); Jeanne Larsson, RN (1995-1996); Katie McCallum (2009); Sandra McClelland, RN (Coordinator, 1993-1995); Bennie McWilliams, MD (Co-Investigator, Director, 1992-1998); Elisha Montoya (1997-2000); Margaret Moreshead (1996-1999); Shirley Murphy, MD (Co-Investigator, 1992-1994); Barbara Ortega, RRT (1993-1999); David Weers (1997-1998); Jose Zayas (1995-1996).

**Washington University, St. Louis, MO:** Robert C. Strunk, MD (Director); Leonard Bacharier, MD (Co-Investigator); Gordon R. Bloomberg, MD (Co-Investigator); Denise Rodgers, RPFT (Coordinator). Ellen Albers (1999-2003); James M. Corry, MD (Co-Investigator, 1995-2004); Karen DeMuth (2006-2007); Lila Kertz, MSN, RN, CPNP (2005-2007); Valerie Morgan, RRT (2004-2007); Cynthia Moseid (2007); Tina Oliver-Welker, CRTT (1993-2007); Deborah K. White, RPFT, RRT (1993-2007).

#### *Resource centers*

**Data Coordinating Center, The Johns Hopkins University, Baltimore, MD:** James Tonascia, PhD (Director). Patricia Belt; Karen Collins; Betty Collison; Ryan Colvin, MPH; John Dodge; Michele Donithan, MHS; Cathleen Ewing; Rosetta Jackson; Hope Livingston; Jill Meinert; Girlie Reyes; Michael Smith; Alice L. Sternberg, ScM; Mark L. Van Natta, MHS; Annette Wagoner; Laura Wilson, ScM; Robert Wise, MD; Katherine Yates, ScM.

**Project Office, National Heart, Lung, and Blood Institute, Bethesda, MD:** Virginia Taggart, MPH (Project Officer); Lois Eggers; James Kiley, PhD; Howard Moore; Gang Zheng, PhD. Paul Albert, PhD (1991-1999); Suzanne Hurd, PhD (1991-1999); Sydney Parker, PhD (1991-1994); Pamela Randall (1992-2003); Margaret Wu, PhD (1991-2001).

#### *Committees*

**Data and Safety Monitoring Board:** Michelle Cloutier, MD (Chair); John Connett, PhD; Leona Cuttler, MD; Frank Gilliland, MD, PhD. Clarence E. Davis, PhD (1993-2003); Howard Eigen, MD (1993-2009, Chair); David Evans, PhD (1993-2007); Meyer Kattan, MD (1993-2007); Rogelio Menendez, MD (1993-2007); F. Estelle R. Simons, MD (1993-2007); Sanford Leikin, MD (1993-1999).

**Steering Committee:** Robert Strunk, MD (Study Chair); N. Franklin Adkinson, MD; Robert Annett, PhD (1992-1995, 1997-1999); Bruce Bender, PhD; Mary Caesar, MHS (1994-1996); Reuben Cherniack, MD (Study Chair 1993-2007); Thomas R. DuHamel, PhD (1992-1994, 1996-1999); Anne Fuhlbrigge, MD; Hartmut Grasemann, MD; H. William Kelly, PharmD; Henry Levison, MD (1992-1996); Alan Lincoln, PhD (1994-1995); Ian MacLusky, MD (1999-2006); Bennie McWilliams, MD (1992-1998); Curtis L. Meinert, PhD; Sydney Parker, PhD (1991-1994); Joe Reisman, MD, FRCP(C), MBA (1991-1999); Denise Rodgers; Kay Seligsohn, PhD (1996-1997); Gail G. Shapiro, MD (1991-

2006); Marian Sharpe (1993-1994); D Sundström (1998-1999); Stanley Szeffler, MD; Virginia Taggart, MPH; Martha Tata, RN (1996-1998); James Tonascia, PhD; Scott Weiss, MD, MS; Barbara Wheeler, RN, BSN (1993-1994); Paul Williams, MD; Robert Wise, MD; Robert Zeiger, MD, PhD.

Supplementary Appendix Figure S1. CAMP trial and follow-up design and features

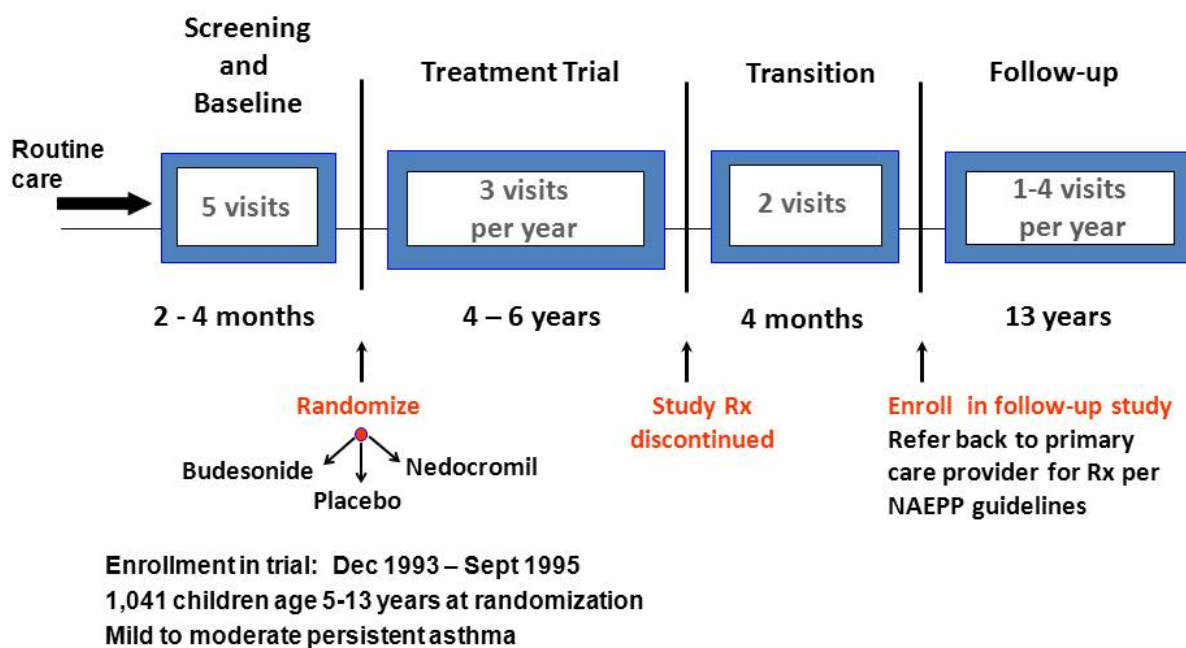

Supplementary Appendix Figure S2. Growth velocity by sex and age during the first 2 years of randomized treatment for 1041 participants in the CAMP trial

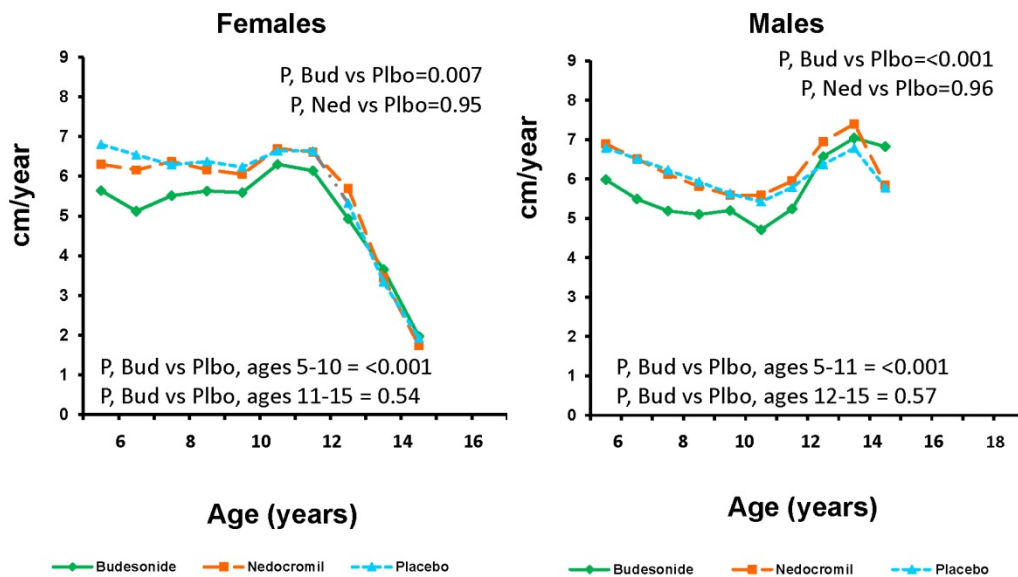

\*Velocities are adjusted for age, race/ethnicity, sex, clinic, duration of asthma, asthma severity, skin test reactivity, and height at trial entry. Bud = budesonide, Ned = nedocromil, Plbo = placebo.



**Supplementary Appendix Table S1. Adjusted mean\* adult height (cm)† by treatment group for 943 participants with adult height known, overall and by subgroup**

|                                         | Bud   | Ned   | Plbo  | Bud vs Plbo            |       | Ned vs Plbo            |      |
|-----------------------------------------|-------|-------|-------|------------------------|-------|------------------------|------|
|                                         |       |       |       | Difference<br>(95% CI) | P     | Difference<br>(95% CI) | P    |
| <b>Overall</b>                          | 171.1 | 172.1 | 172.3 | -1.2                   | 0.001 | -0.2                   | 0.61 |
| (N[total N=943])                        | (281) | (285) | (377) | (-1.9 to -0.5)         |       | (-0.9 to 0.5)          |      |
| <b>By subgroup</b>                      |       |       |       |                        |       |                        |      |
| <b>Sex</b>                              |       |       |       |                        |       |                        |      |
| Females                                 | 162.8 | 163.9 | 164.6 | -1.8                   | 0.001 | -0.7                   | 0.26 |
| (N[total N=385])                        | (120) | (100) | (165) | (-2.9 to -0.7)         |       | (-1.8 to 0.5)          |      |
| Males                                   | 176.8 | 177.6 | 177.6 | -0.8                   | 0.10  | -0.0                   | 0.98 |
| (N [total N=558])                       | (161) | (185) | (212) | (-1.8 to 0.2)          |       | (-0.9 to 0.9)          |      |
| P (interaction, by sex)                 |       |       |       |                        | 0.10  |                        | 0.49 |
| <b>Age at randomization<br/>(years)</b> |       |       |       |                        |       |                        |      |
| 5-8                                     | 170.7 | 171.8 | 172.6 | -1.9                   | 0.004 | -0.8                   | 0.22 |
| (N[total N=489])                        | (145) | (150) | (194) | (-3.2 to -0.6)         |       | (-2.1 to 0.5)          |      |
| 9-13                                    | 171.4 | 172.4 | 171.9 | -0.5                   | 0.37  | 0.5                    | 0.48 |
| (N[total N=454])                        | (136) | (135) | (183) | (-1.7 to 0.6)          |       | (-0.8 to 1.6)          |      |
| P (interaction, by age)                 |       |       |       |                        | 0.12  |                        | 0.15 |
| <b>Race/ethnicity</b>                   |       |       |       |                        |       |                        |      |
| White or other                          | 171.3 | 172.4 | 172.7 | -1.4                   | 0.001 | -0.3                   | 0.51 |
| (N [total N=725])                       | (209) | (225) | (291) | (-2.3 to -0.6)         |       | (-1.1 to 0.5)          |      |
| Black                                   | 169.9 | 172.4 | 171.2 | -1.3                   | 0.27  | 1.2                    | 0.31 |
| (N [total N=131])                       | (42)  | (35)  | (54)  | (-3.5 to 1.0)          |       | (-1.1 to 3.5)          |      |
| Hispanic                                | 171.4 | 168.4 | 170.3 | 1.1                    | 0.35  | -1.9                   | 0.11 |
| (N [total N=87])                        | (30)  | (25)  | (32)  | (-1.2 to 3.4)          |       | (-4.2 to 0.4)          |      |
| P (interaction, by<br>race/ethnicity)   |       |       |       |                        | 0.50  |                        | 0.07 |

|                                                 | Bud            | Ned            | Plbo           | Bud vs Plbo            |      | Ned vs Plbo            |      |
|-------------------------------------------------|----------------|----------------|----------------|------------------------|------|------------------------|------|
|                                                 |                |                |                | Difference<br>(95% CI) | P    | Difference<br>(95% CI) | P    |
| <b>Duration of asthma</b>                       |                |                |                |                        |      |                        |      |
| Less than 3 years<br>(N [total N = 249])        | 169.5<br>(61)  | 171.2<br>(83)  | 171.4<br>(105) | -1.9<br>(-3.5 to -0.4) | 0.02 | -0.2<br>(-1.6 to 1.3)  | 0.84 |
| At least 3 but < 7 years<br>(N [total N = 486]) | 171.4<br>(153) | 172.1<br>(138) | 172.1<br>(195) | -0.7<br>(-1.9 to 0.2)  | 0.13 | -0.0<br>(-1.1 to 1.1)  | 0.86 |
| At least 7 years<br>(N [total N = 208])         | 172.1<br>(67)  | 173.2<br>(64)  | 173.7<br>(77)  | -1.6<br>(-3.4 to -0.2) | 0.05 | -0.5<br>(-2.1 to 1.1)  | 0.59 |
| P (interaction by duration)                     |                |                |                |                        | 0.35 |                        | 0.89 |

Bud = budesonide, Ned=nedocromil, Plbo=placebo, CI=confidence interval

\*Means are adjusted for age, race/ethnicity, sex, clinic, duration of asthma, asthma severity, skin test reactivity, and height at trial entry.

†Adult height is the mean of all height measures at age  $\geq 18$  (female) or age  $\geq 20$  (male) if there is at least 1 measure at age  $\geq 18$  (females) or age  $\geq 20$  (males) and is the chronologically later height in the most recent pair of height measurements obtained at least 1 year apart and differing by  $< 1$  cm otherwise. Of the 943 participants with adult height known, adult height is calculated from heights at age  $\geq 18$  (females) or age  $\geq 20$  (males) for 913 (96.8%) participants and from heights obtained  $\geq 1$  year apart and differing by  $< 1$  cm for 30 (3.2%) participants. Adult height is not known for 98 (9.4%) participants (35 females with median age at last height measurement = 12 years (range 8-17) and 63 males with median age at last height measurement = 14 years (range 7-19)).

**Supplementary Appendix Table S2. Comparison of those with adult height missing\* to those with adult height known, as of entry into the CAMP trial**

|                                      | N    | Adult height missing*<br>(N=98) | Adult height known<br>(N=943) | P†    | P‡   | P§   |
|--------------------------------------|------|---------------------------------|-------------------------------|-------|------|------|
| Total                                | 1041 | 9.4%                            | 90.6%                         |       |      |      |
|                                      |      |                                 |                               |       |      |      |
| <b>Treatment group in CAMP trial</b> |      |                                 |                               | 0.86  |      |      |
| Budesonide                           | 311  | 30.6%                           | 29.8%                         |       |      |      |
| Nedocromil                           | 312  | 27.6%                           | 30.2%                         |       |      |      |
| Placebo                              | 418  | 41.8%                           | 40.0%                         |       |      |      |
|                                      |      |                                 |                               |       |      |      |
| <b>Clinic</b>                        |      |                                 |                               | 0.002 | 0.18 | 0.59 |
| Albuquerque                          | 121  | 16.3%                           | 11.1%                         |       |      |      |
| Baltimore                            | 128  | 11.2%                           | 12.4%                         |       |      |      |
| Boston                               | 124  | 7.1%                            | 12.4%                         |       |      |      |
| Denver                               | 144  | 22.4%                           | 12.9%                         |       |      |      |
| San Diego                            | 122  | 12.2%                           | 11.7%                         |       |      |      |
| Seattle                              | 144  | 16.3%                           | 13.6%                         |       |      |      |
| St Louis                             | 133  | 1.0%                            | 14.0%                         |       |      |      |
| Toronto                              | 125  | 13.3%                           | 11.9%                         |       |      |      |
|                                      |      |                                 |                               |       |      |      |
| <b>Age (years)</b>                   |      |                                 |                               | 0.67  | 0.57 | 0.53 |
| 5-8                                  | 542  | 54.1%                           | 51.9%                         |       |      |      |
| 9-13                                 | 499  | 45.9%                           | 48.1%                         |       |      |      |
|                                      |      |                                 |                               |       |      |      |

|                                                             | <b>N</b> | <b>Adult height missing* (N=98)</b> | <b>Adult height known (N=943)</b> | <b>P†</b> | <b>P‡</b> | <b>P§</b> |
|-------------------------------------------------------------|----------|-------------------------------------|-----------------------------------|-----------|-----------|-----------|
| <b>Race or ethnic group</b>                                 |          |                                     |                                   | 0.16      | 0.59      | 0.51      |
| White or other                                              | 805      | 81.6%                               | 76.9%                             |           |           |           |
| Black                                                       | 138      | 7.1%                                | 13.9%                             |           |           |           |
| Hispanic                                                    | 98       | 11.2%                               | 9.2%                              |           |           |           |
|                                                             |          |                                     |                                   |           |           |           |
| <b>Sex</b>                                                  |          |                                     |                                   | 0.33      | 0.34      | 0.20      |
| Female                                                      | 420      | 35.7%                               | 40.8%                             |           |           |           |
| Male                                                        | 621      | 64.3%                               | 59.2%                             |           |           |           |
|                                                             |          |                                     |                                   |           |           |           |
| <b>Duration of since doctor diagnosis of asthma (years)</b> |          |                                     |                                   | 0.96      | 0.74      | 0.21      |
| Less than 3                                                 | 276      | 27.6%                               | 26.4%                             |           |           |           |
| At least 3 but less than 7                                  | 535      | 50.0%                               | 51.5%                             |           |           |           |
| At least 7                                                  | 230      | 22.4%                               | 22.1%                             |           |           |           |
|                                                             |          |                                     |                                   |           |           |           |
| <b>Severity of asthma</b>                                   |          |                                     |                                   | 0.85      | 0.53      | 0.80      |
| Mild                                                        | 498      | 46.9%                               | 47.9%                             |           |           |           |
| Moderate                                                    | 543      | 53.1%                               | 52.1%                             |           |           |           |
|                                                             |          |                                     |                                   |           |           |           |
| <b>Any skin test reactivity</b>                             |          |                                     |                                   | 0.10      | 0.47      | 0.40      |
| Yes                                                         | 914      | 82.7%                               | 88.3%                             |           |           |           |
| No                                                          | 127      | 17.3%                               | 11.7%                             |           |           |           |
|                                                             |          |                                     |                                   |           |           |           |
| <b>Linear height</b>                                        |          |                                     |                                   |           |           |           |
| cm                                                          | --       | 131.1 ± 13.5                        | 133.7 ± 13.9                      | 0.08      | 0.94      | 0.50      |

\*Adult height missing: no height measurement at age  $\geq 18$  (females) or age  $\geq 20$  (males) and no pair of height measurements  $\geq 1$  year apart and differing by  $< 1$  cm.

†Chi squared test or t test P-value for homogeneity among groups.

‡P-value for interaction of budesonide treatment with covariate in logistic regression model with adult height status (known vs. missing) as the outcome and budesonide treatment (yes vs. no), the covariate, and the budesonide by covariate interaction as the regressors.

§ P-value for interaction of nedocromil treatment with covariate in logistic regression model with adult height status (known vs. missing) as the outcome and nedocromil treatment (yes vs. no), the covariate, and the nedocromil by covariate interaction as the regressors.

**Supplementary Appendix Table S3: Measures of treatment and other characteristics related to adult height in mild/moderate asthma for 914 participants with adult height and all covariates known**

|                                                                                          |       | Multiple linear regression on adult height: |                              |        |
|------------------------------------------------------------------------------------------|-------|---------------------------------------------|------------------------------|--------|
|                                                                                          |       | % with feature or mean                      | Diff in height (cm) (95% CI) | P      |
| Mean daily weight-adjusted ICS dose during 1 <sup>st</sup> 2 years of follow-up (mcg/kg) | 0.005 | -0.1<br>(-0.2 to -0.0)                      | 0.007                        |        |
|                                                                                          |       |                                             |                              |        |
| Total prednisone dose over follow-up to adult height (mg)                                | 992.0 | -0.0<br>(-0.0 to 0.0)                       | 0.76                         |        |
|                                                                                          |       |                                             |                              |        |
| <b>Demographics</b>                                                                      |       |                                             |                              |        |
| Race/ethnicity                                                                           |       |                                             |                              | <0.001 |
| Black (vs. White or other)                                                               | 13.8% | -0.1<br>(-1.3 to 1.1)                       | 0.88                         |        |
| Hispanic (vs. White or other)                                                            | 9.5%  | -3.0<br>(-4.4 to -1.6)                      | <0.001                       |        |
| Female (vs. male)                                                                        | 40.8% | -13.7<br>(-14.4 to -12.9)                   | <0.001                       |        |
|                                                                                          |       |                                             |                              |        |
| <b>Physical development at trial entry and parental height</b>                           |       |                                             |                              |        |
| ≥Tanner Stage 2 in ≥ 1 category (vs. Stage 1 in all)†                                    | 30.5% | -3.9<br>(-4.9 to -2.9)                      | <0.001                       |        |
| Height, cm (per unit change)                                                             | 133.8 | 0.3<br>(0.3 to 0.4)                         | <0.001                       |        |

|                                                          |                        | Multiple linear regression on adult height: |        |        |
|----------------------------------------------------------|------------------------|---------------------------------------------|--------|--------|
|                                                          | % with feature or mean | Diff in height (cm) (95% CI)                | P      | P*     |
| Body mass index, kg/m <sup>2</sup> (per unit change)     | 18.2                   | -0.3<br>(-0.4 to -0.2)                      | <0.001 |        |
| <b>Asthma severity and atopy at trial entry</b>          |                        |                                             |        |        |
| Moderate severity (vs. mild)                             | 52.5%                  | 0.5<br>(-0.3 to 1.4)                        | 0.22   |        |
| Duration since diagnosis                                 |                        |                                             |        | <0.001 |
| Medium (≥3 years and <7 years; vs. short duration)       | 51.9%                  | -0.4<br>(-1.3 to 0.6)                       | 0.45   |        |
| Long (≥7 years; vs. short duration)                      | 21.9%                  | -2.6<br>(-3.8 to -1.4)                      | <0.001 |        |
| Any prednisone in 6 months prior to screening (vs. none) | 35.5%                  | 0.8<br>(-0.1 to 1.7)                        | 0.07   |        |
| Any ICS in 6 months prior to screening (vs. none)        | 38.0%                  | 0.2<br>(-0.6 to 1.1)                        | 0.59   |        |
| Any positive skin tests (vs. none)§                      | 88.2%                  | -2.3<br>(-3.5 to -1.0)                      | <0.001 |        |
| <b>Vitamin D level at trial entry</b>                    |                        |                                             |        |        |
| 30 ng/mL or less (vs. > 30 ng/mL)                        | 35.9%                  | -1.2<br>(-2.1 to -0.4)                      | 0.004  |        |
| <b><i>In utero</i> smoke exposure</b>                    |                        |                                             |        |        |
| Any (vs. none)                                           | 14.0%                  | -0.8<br>(-1.9 to 0.3)                       | 0.14   |        |

Notes: ICS = inhaled corticosteroid. Outcome is also adjusted for clinic.

\*P-value for indicated combination of factors.

††Tanner stage categories: females: breast, pubic hair, and menarche status; males: genital and pubic hair.

§Each participant was tested with 10 core allergens and up to 10 additional allergens considered to be relevant to the location of the CAMP clinical center.
